# Supplementary material
Source: publisher site journal article supplement (https://www.dovepress.com/article/584725)
Supplement: Supplementary file 1 [file 584725%20Supplementary%20Material.docx]

**Supplementary Table S1** Laboratory work-up results for *Talaromyces marneffei* infection

| **Laboratory indexes** | **Case1** | **Case2** | **Case3** | **Case4** | **Case5** | **Case6** |
| --- | --- | --- | --- | --- | --- | --- |
| WBC (×109/L, 3.5-9.5) | 9.48 | 10.71 | 11.23 | 4.54 | 5.0 | 3.41 |
| ANC (×109/L, 1.8-6.3) | 8.01 | 10.1 | 9.49 | 2.88 | 2.38 | 2.37 |
| ALC (×109/L, 1.1-3.2) | 0.82 | 0.25 | 0.92 | 1.29 | 2.28 | 0.83 |
| HB (g/L, 115.0-150.0) | 130 | 123 | 154 | 119 | 154 | 113 |
| PLT (×109/L, 125-350) | 292 | 460 | 209 | 218 | 226 | 146 |
| IgG (g/L, 7.0-16.0) | 7.05 | 15.97 | 10.29 | 19.52 | - | 16.67 |
| IgA (g/L, 0.7-5.0) | 1.77 | 1.24 | 2.17 | 7.31 | - | 2.38 |
| IgM (g/L, 0.4-2.8) | 0.87 | 0.97 | 1.49 | 1.51 | - | 0.9 |
| C3 (g/L, 0.79-1.62) | 0.97 | 1.42 | 1.28 | 1.39 | - | 1.28 |
| C4 (g/L, 0.1-0.4) | 0.24 | 0.4 | 0.33 | 0.32 | - | 0.42 |
| Albumin (g/L,40.0-55.0) | 27.6 | 37.1 | 36.5 | 32.5 | 45.6 | 33.3 |
| Globulin (g/L, 20.0-40.0) | 27.3 | 33.4 | 31.3 | 43.2 | 30.9 | 34.1 |
| ALT (U/L, 9.0-50.0) | 15.7 | 16.7 | 15.2 | 39.5 | 12 | 23.3 |
| AST (U/L, 15.0-40.0) | 16.5 | 17.3 | 18.7 | 40.2 | 20 | 51.2 |
| EGFR (mL/min, >90.0) | 142.9 | 93.4 | 118.7 | 130 | 118 | 103.6 |
| UA(umol/L, 208.0-428.0) | 136.8 | 158.4 | 171.3 | 191 | 389 | 412.6 |
| Cr (umol/L, 59.0-104.0) | 36.5 | 61.8 | 50 | 57.4 | 83 | 85 |
| GLU (mmol  /L, 3.9-6.1)/HbA1c (%, 4.0-6.3) | - | 4.33/5.5 | 12.17/10.0 | 4.54/- | - | 6.4/5.8 |
| SAA (mg/L, 0-10.0) | - | 279.41 | - | - | 2.7 | 121.6 |
| CRP (mg/L, 0-7.0) | 61.23 | 25.41 | 99.44 | 71.57 | 0.5 | 28.78 |
| PCT (ng/mL, 0-0.5) | 0.06 | 0.17 | <0.04 | - | - | 0.07 |
| ESR (mm/h, 0-15) | 69 | 79 | 37 | 93 | - | 68 |
| HBP (ng/ml, ≤11.4) | 31.93 | >300 | - | 39.29 | - | - |
| IL-2 (pg/mL, 0-7.5) | - | 8.4 | 12.27 | 0.41 | - | - |
| IL-4 (pg/mL, 0-8.56) | - | <1.41 | 5.28 | 0.68 | - | - |
| IL-6 (pg/mL, 0-5.4) | - | 10.43 | 15.92 | 7.63 | - | - |
| IL-10 (pg/mL, 0-12.9) | - | 3.89 | 5.91 | 2.22 | - | - |
| TNF-α (pg/mL, 0-16.5) | - | <2.05 | <2.12 | 2.36 |  |  |
| IFN-γ (pg/mL, 0-23.1) | - | 4.86 | 32.06 | 20.88 | - | - |
| CD3+ (%, 60.0-85.0) | 49.05 | 62.2 | 74.14 | 92.77 | - | 86.43 |
| CD4 (%, 24.5-48.8) | 25.18 | 36.86 | 46.29 | 2.61 | - | 6.06 |
| CD8 (%, 18.5-42.1) | 22.56 | 24.26 | 30.57 | 87.65 | - | 79.5 |
| NKc (%, 8.0-20.0) | 46.58 | 26.94 | 6.78 | - | - | 5.77 |
| CD19+ (%, 7.0-23.0) | 5.24 | 8.31 | 19.47 | - | - | 6.93 |
| CD3+ (/uL, 660-2720) | - | 361 | 764 | - | - | 328 |
| CD4+T (/uL, 250-1561.6) | - | 214 | 477 | - | - | 23 |
| CD8+T (/uL, 203.5-1347.2) | - | 141 | 315 | - | - | 302 |
| CD19+ (/uL, 77-736 | - | 48 | 201 |  |  | 26 |
| NKc (/uL, 88-640) | - | 156 | 70 | - | - | 22 |
| SF (ng/ml, 21.8-274.66) | - | 423.26 | - | 2160.12 | - | 1572.98 |
| DD (mg/L, 0-0.7) | 0.48 | 1.37 | 0.13 | 5 | - | 4.47 |
| G test (pg/mL, <60) | 60.7 | <37.5 | - | <40 | <5.0 | - |
| GM test (ug/L, <0.25) | - | <0.1 | 0.46a; <0.10b | - | 0.153 | - |

**Abbreviation:** WBC, white blood cell; ANC, absolute neutrophil count; ALC, Absolute Lymphocyte Count; PLT, platelet; IgG, serum immunoglobulin G; IgA, serum immunoglobulin A; IgM, serum immunoglobulin M; C3, Complement 3; C4, Complement 4; ALT, alanine aminotransferase; AST, Aspartate aminotransferase; EGFR, epidermal growth factor receptor; UA, urine acid; Cr, creatinine; GLU, Glucose; SAA, Serumamyloid A; CRP, C-reactive protein; PCT, procalcitonin; ESR, erythrocyte sedimentation rate; HBP, Heparin-Binding Protein; IL, interleukin; TNF, Tumor necrosis factor; CD, cluster of differentiation; NKc, natural killer cell; SF, serum ferritin; DD, D-Dimer.

**Notes:**-, not detected; a, Serum; b, Bronchoalveolar Lavage Fluid; the values in the left column indicate the normal reference ranges for the respective parameters.
